# Supplementary material
Source: Springer Nature journal article supplement (https://www.springermedizin.de/resource/supplementary/12985_2009_623_MOESM6_ESM.pdf/9608128)

**A**

## The Effect of Inhibitors on HPV16 Infection

### HPV16 infections

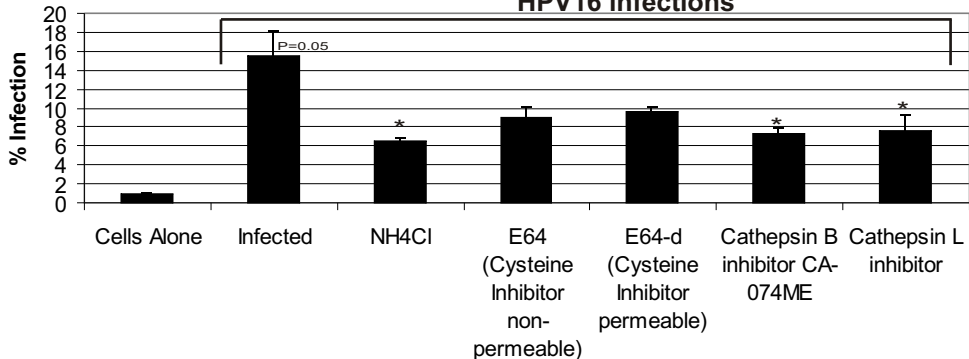

\* = P&lt;0.05

Supplement: MOESM6 [file 9608128]
